# Supplementary material
Source: Springer Nature journal article supplement (https://www.springermedizin.de/resource/supplementary/12936_2008_754_MOESM1_ESM.pdf/9548950)

Total Screened : 867

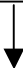

Total enrolled : N =397

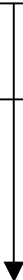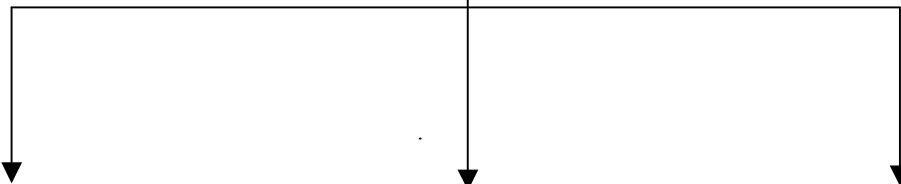

AS+AQ  
n = 133

AS+SP  
n=132

AQ+SP  
n=132

Travel = 2

Travel=1  
Death=1

Travel =2

Evaluable by day 28  
n=131

Evaluable by day 28  
n =130

Evaluable by day 28  
n =130

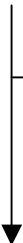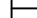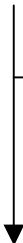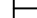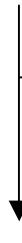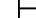

Supplement: MOESM1 [file 9548950]
